# Supplementary material for: Attempts to Create Products with Increased Health-Promoting Potential Starting with Pinot Noir Pomace: Investigations on the Process and Its Methods
Source: MDPI journal article supplement (doi:10.3390/foods11141999), 2022-07-06
Supplement: s1 [file s1]

# **Attempts to Create Products with Increased Health-Promoting Potential Starting with Pinot Noir Pomace: Investigations on the Process and Its Methods**

Stephen Lo <sup>1\*</sup>, Lisa I. Pilkington <sup>1</sup>, David Barker <sup>1,2</sup> and Bruno Fedrizzi <sup>1,2,\*</sup>

1. School of Chemical Sciences, University of Auckland, 23 Symonds St, Auckland 1010, New Zealand; [lisa.pilkington@auckland.ac.nz](mailto:lisa.pilkington@auckland.ac.nz) (L.I.P.); [d.barker@auckland.ac.nz](mailto:d.barker@auckland.ac.nz) (D.B.); [b.fedrizzi@auckland.ac.nz](mailto:b.fedrizzi@auckland.ac.nz) (B.F.)
2. Centre for Green Chemical Science, School of Chemical Sciences, University of Auckland, Private Bag 92019, Auckland 1010, New Zealand

\* Correspondence: [s.lo@auckland.ac.nz](mailto:s.lo@auckland.ac.nz)

## Supplementary Material

**Table S1:** HPLC method established by [1] for analysis of phenolic compounds in red wine.

| <b>Time<br/>(min)</b> | <b>Solvent A<br/>(%)</b> | <b>Solvent B<br/>(%)</b> | <b>Solvent C<br/>(%)</b> |
|-----------------------|--------------------------|--------------------------|--------------------------|
| 0                     | 45                       | 55                       | 0                        |
| 10                    | 25                       | 75                       | 0                        |
| 20                    | 0                        | 100                      | 0                        |
| 30                    | 0                        | 100                      | 0                        |
| 50                    | 0                        | 90                       | 10                       |
| 70                    | 0                        | 85                       | 15                       |
| 80                    | 0                        | 80                       | 20                       |
| 95                    | 0                        | 60                       | 40                       |
| 105                   | 0                        | 55                       | 45                       |
| 115                   | 45                       | 55                       | 0                        |
| 125                   | 45                       | 55                       | 0                        |

**Table S2:** Quantities of flavonoids extracted with each solvent system and their rank in extraction efficiency. Values are averages of quantities measured in triplicate.

| Solvent System |                      |          | (+)-Catechin     |                  | (-)-Epicatechin  |                  | Quercetin                         |                  |
|----------------|----------------------|----------|------------------|------------------|------------------|------------------|-----------------------------------|------------------|
| Acetone (%)    | H <sub>2</sub> O (%) | EtOH (%) | mg /kg of pomace | Rank (out of 28) | mg /kg of pomace | Rank (out of 28) | mg of rutin hydrate /kg of pomace | Rank (out of 28) |
| 80             | 20                   | 0        | 174.1 (± 17.1)   | 1                | 259.3 (± 38.1)   | 4                | 49.5 (± 1.2)                      | 15               |
| 70             | 30                   | 0        | 169.6 (± 6.9)    | 4                | 244.7 (± 5.0)    | 6                | 48.8 (± 5.3)                      | 17               |
| 70             | 20                   | 10       | 160.1 (± 18.7)   | 9                | 232.7 (± 30.6)   | 11               | 45.3 (± 3.4)                      | 21               |
| 60             | 40                   | 0        | 166.6 (± 24.2)   | 5                | 263.1 (± 24.1)   | 3                | 53.6 (± 11.1)                     | 12               |
| 60             | 30                   | 10       | 148.4 (± 25.7)   | 16               | 218.8 (± 39.5)   | 16               | 49.0 (± 14.3)                     | 16               |
| 60             | 20                   | 20       | 154.9 (± 17.0)   | 13               | 233.8 (± 13.2)   | 10               | 39.6 (± 2.1)                      | 23               |
| 50             | 50                   | 0        | 156.2 (± 19.8)   | 11               | 240.1 (± 28.8)   | 8                | 54.4 (± 5.8)                      | 10               |
| 50             | 40                   | 10       | 157.0 (± 32.1)   | 10               | 231.1 (± 39.0)   | 12               | 66.5 (± 4.2)                      | 4                |
| 50             | 30                   | 20       | 165.9 (± 16.3)   | 7                | 250.9 (± 25.3)   | 5                | 72.3 (± 39.1)                     | 2                |
| 50             | 20                   | 30       | 152.5 (± 9.7)    | 14               | 240.7 (± 56.5)   | 7                | 52.4 (± 20.1)                     | 13               |
| 40             | 60                   | 0        | 144.3 (± 16.2)   | 19               | 218.6 (± 35.6)   | 17               | 51.1 (± 1.3)                      | 14               |
| 40             | 50                   | 10       | 169.9 (± 28.3)   | 3                | 227.1 (± 18.8)   | 14               | 87.0 (± 46.4)                     | 1                |
| 40             | 40                   | 20       | 173.3 (± 23.9)   | 2                | 269.6 (± 34.1)   | 1                | 55.0 (± 1.3)                      | 9                |
| 40             | 30                   | 30       | 164.7 (± 18.4)   | 8                | 240.1 (± 8.9)    | 9                | 58.9 (± 1.0)                      | 7                |
| 40             | 20                   | 40       | 155.5 (± 13.9)   | 12               | 224.7 (± 26.7)   | 15               | 46.0 (± 5.8)                      | 20               |
| 30             | 70                   | 0        | 139.7 (± 42.7)   | 20               | 194.3 (± 44.0)   | 22               | 26.3 (± 2.2)                      | 27               |
| 30             | 60                   | 10       | 131.1 (± 23.8)   | 24               | 190.3 (± 28.5)   | 23               | 48.4 (± 2.0)                      | 18               |
| 30             | 50                   | 20       | 166.1 (± 22.5)   | 6                | 265.1 (± 37.6)   | 2                | 54.2 (± 0.6)                      | 11               |
| 30             | 40                   | 30       | 151.4 (± 10.3)   | 15               | 230.7 (± 19.8)   | 13               | 63.1 (± 7.9)                      | 6                |
| 30             | 30                   | 40       | 146.5 (± 20.8)   | 17               | 211.6 (± 10.9)   | 19               | 67.7 (± 36.0)                     | 3                |
| 30             | 20                   | 50       | 139.6 (± 8.7)    | 21               | 216.7 (± 28.9)   | 18               | 33.2 (± 11.7)                     | 24               |
| 20             | 80                   | 0        | 114.1 (± 12.0)   | 27               | 148.6 (± 11.1)   | 28               | 8.9 (± 0.7)                       | 28               |
| 20             | 70                   | 10       | 135.4 (± 13.9)   | 23               | 179.0 (± 35.8)   | 27               | 27.3 (± 5.1)                      | 26               |
| 20             | 60                   | 20       | 123.5 (± 21.0)   | 26               | 182.6 (± 45.0)   | 25               | 43.7 (± 13.6)                     | 22               |
| 20             | 50                   | 30       | 145.3 (± 10.2)   | 18               | 209.4 (± 13.9)   | 20               | 55.4 (± 5.8)                      | 8                |
| 20             | 40                   | 40       | 137.4 (± 17.2)   | 22               | 208.8 (± 25.3)   | 21               | 65.8 (± 3.3)                      | 5                |
| 20             | 30                   | 50       | 129.2 (± 24.3)   | 25               | 185.3 (± 40.8)   | 24               | 46.2 (± 1.0)                      | 19               |
| 20             | 20                   | 60       | 112.3 (± 11.3)   | 28               | 182.1 (± 18.4)   | 26               | 32.7 (± 2.8)                      | 25               |

**Figure S1:** IR spectra of a) non-derivatised extracted residue of Pinot noir pomace; b) residue derivatised with octanoyl chloride; c) residue derivatised with lauroyl chloride; and d) residue derivatised with palmitoyl chloride.

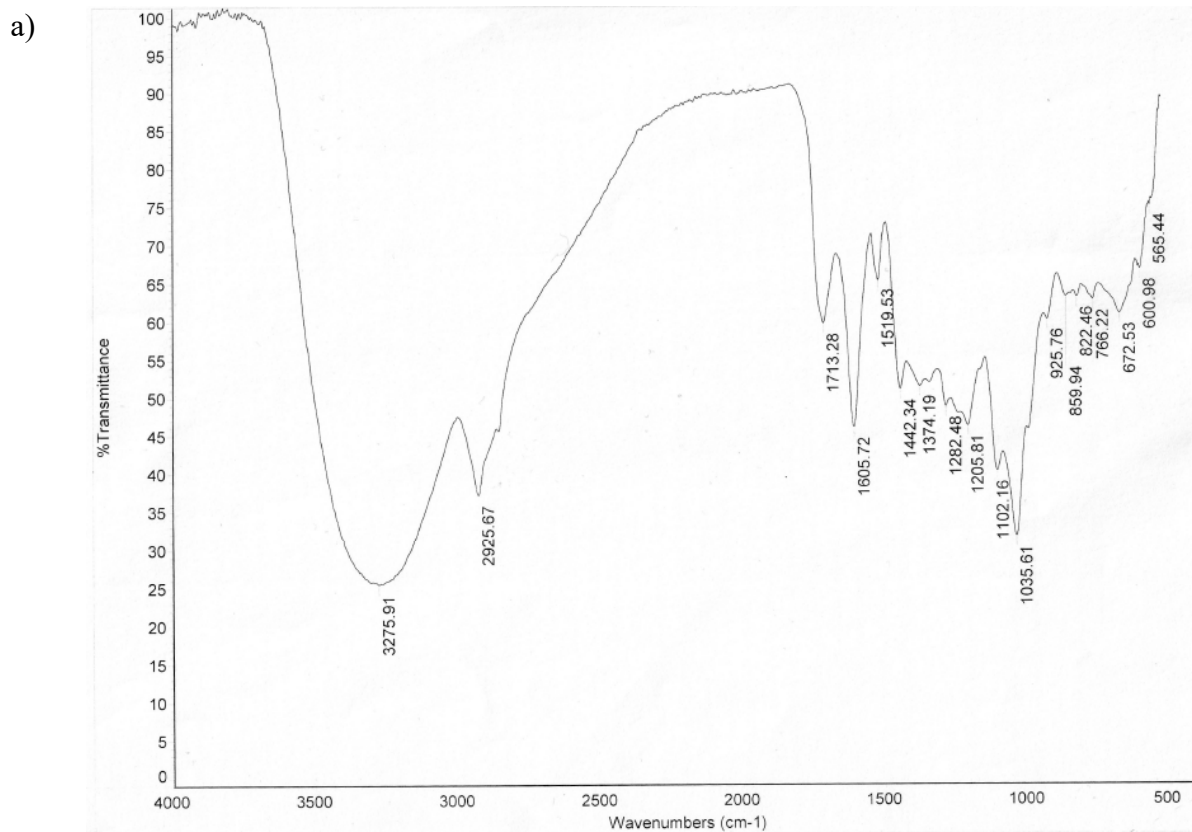

b)

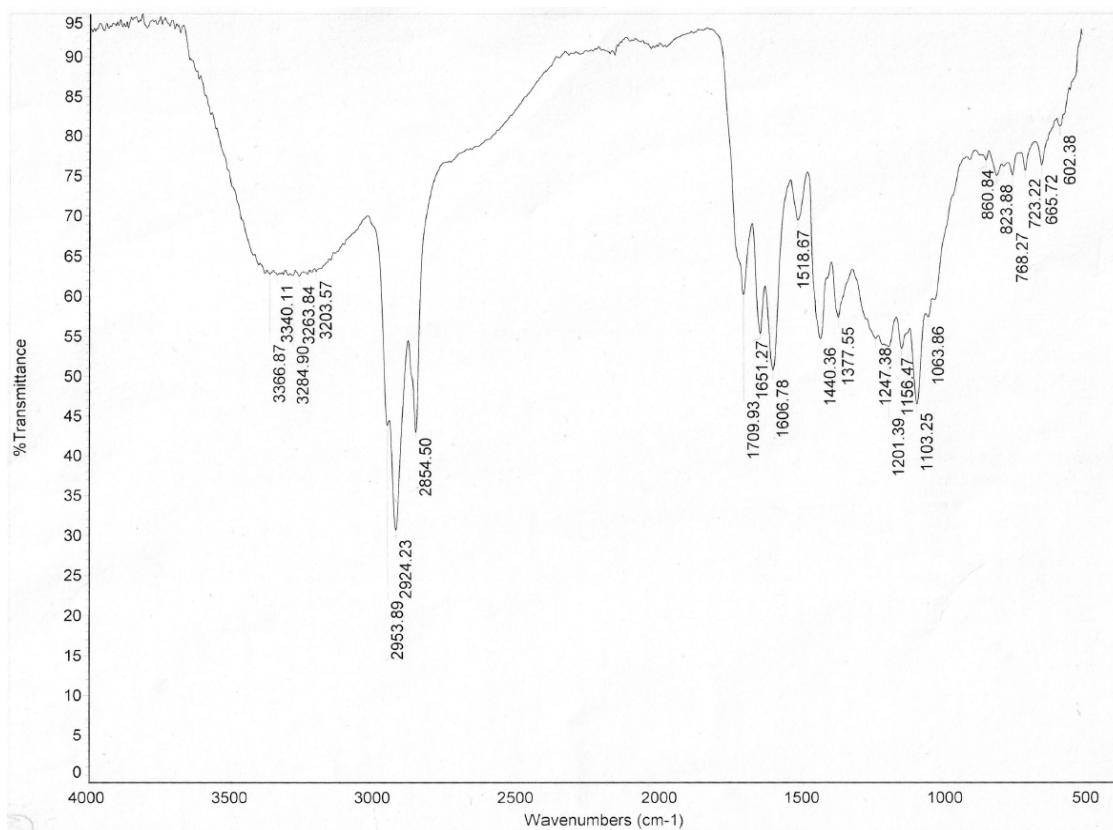

c)

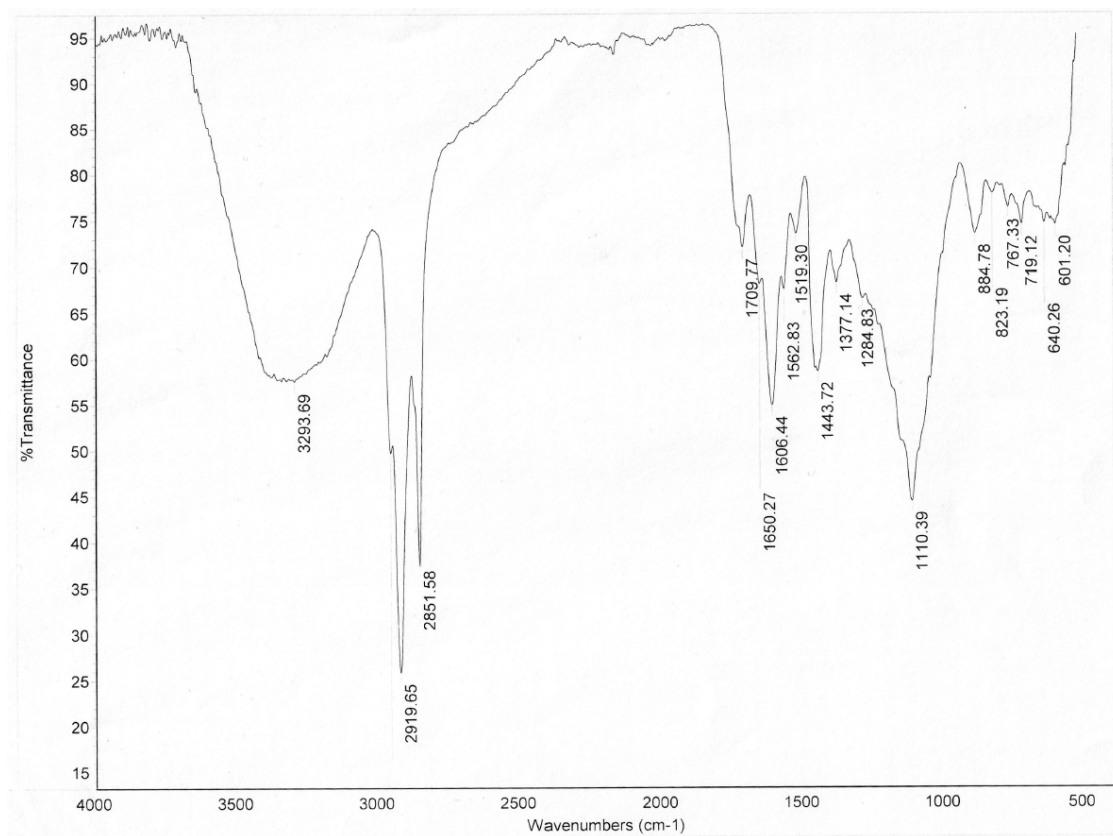

d)

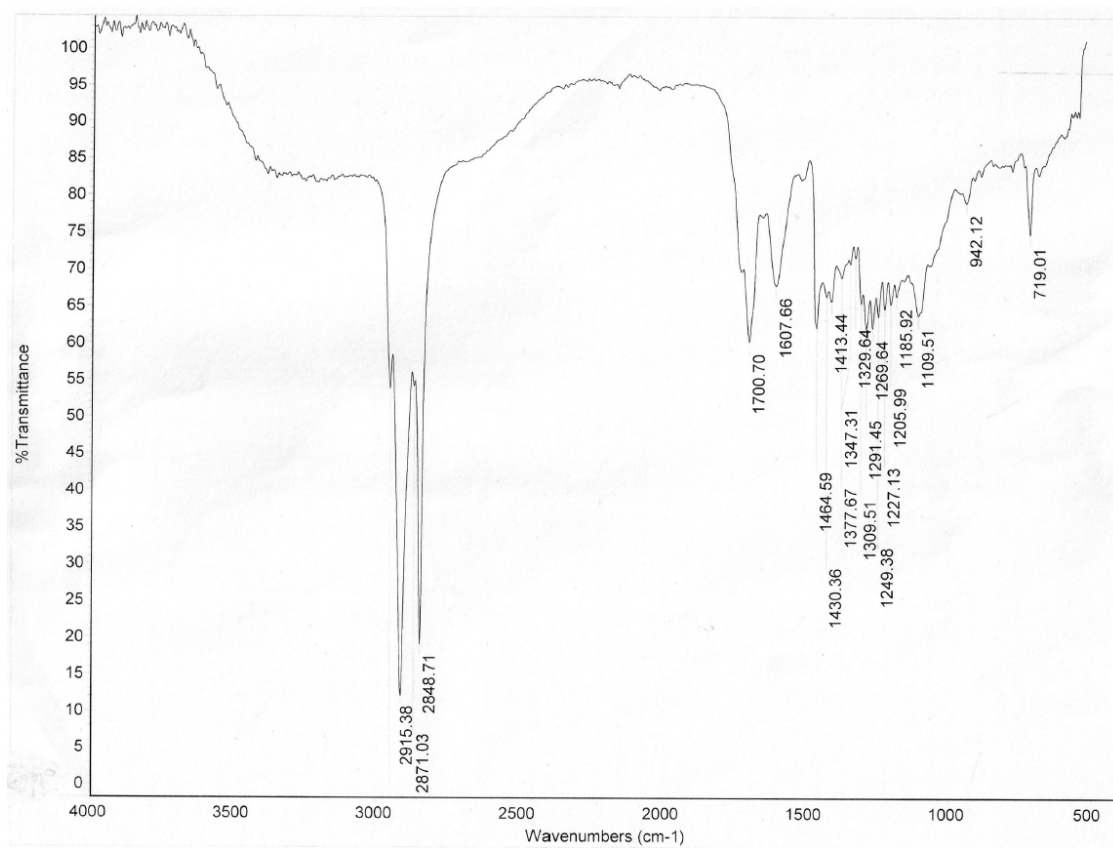

## References

1. Kilmartin PA, Zou H, Waterhouse AL (2002) Correlation of Wine Phenolic Composition versus Cyclic Voltammetry Response. *Am J Enol Vitic* 53:294–302
